# Supplementary material
Source: publisher figshare collection journal article supplement (https://sage.figshare.com/ndownloader/files/12993266)
Supplement: Supplementary file 1 [file 12993266]

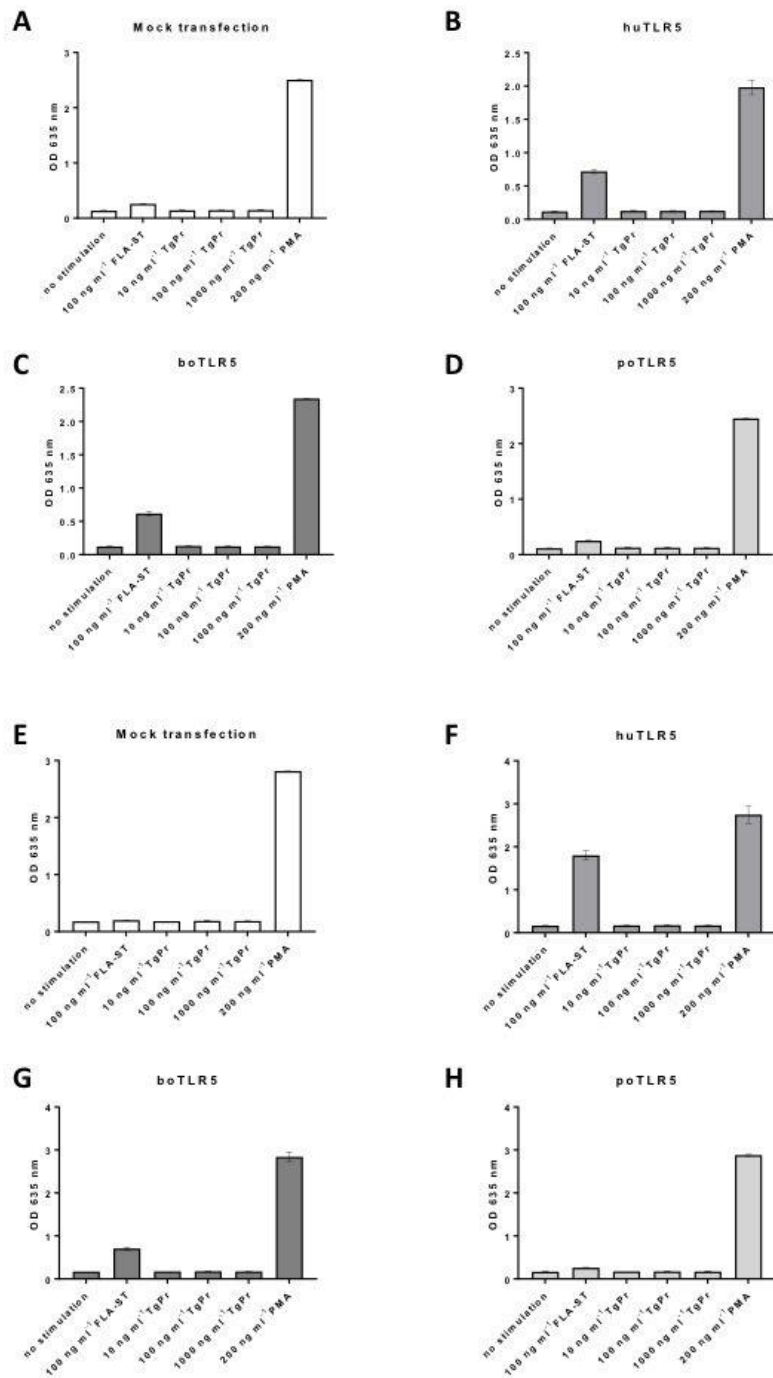

**Supplementary Figure 1.** SEAP assay results after transfectant selection. SEAP reporter cells transfected with species-specific TLR5 genes were cultured in media with selection antibiotic. SEAP assays were repeated after 1 wk (A–D) and 2 wk (E–H) of culture. Transfectants were assayed with 100 ng ml<sup>-1</sup> FLA-ST, 10 ng ml<sup>-1</sup>, 100 ng ml<sup>-1</sup> or 1000 ng ml<sup>-1</sup> TgPr, media only control and PMA. SEAP activity was measured by the colour change resulting from alkaline phosphatase substrate conversion at 635 nm wavelength in duplicates (mean ± SD).

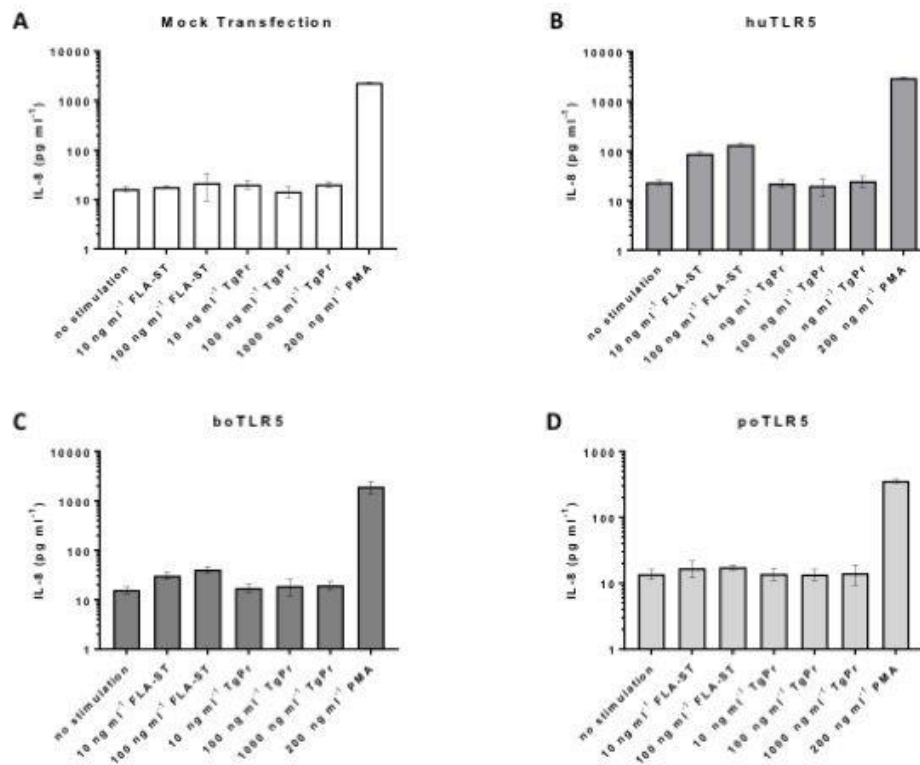

**Supplementary Figure 2.** Results of IL-8 measurement from SEAP assay supernatants. Culture supernatants from mock transfected (A) SEAP reporter cells or from cells transfected with hu(B), bo (C) and po (D) TLR5 were assayed for IL-8 concentrations after stimulation with 10 ng ml<sup>-1</sup> or 100 ng ml<sup>-1</sup> FLA-ST, 10 ng ml<sup>-1</sup>, 100 ng ml<sup>-1</sup> or 1000 ng ml<sup>-1</sup> TgPr and controls (media only for negative, PMA for positive control) (mean  $\pm$  SD).

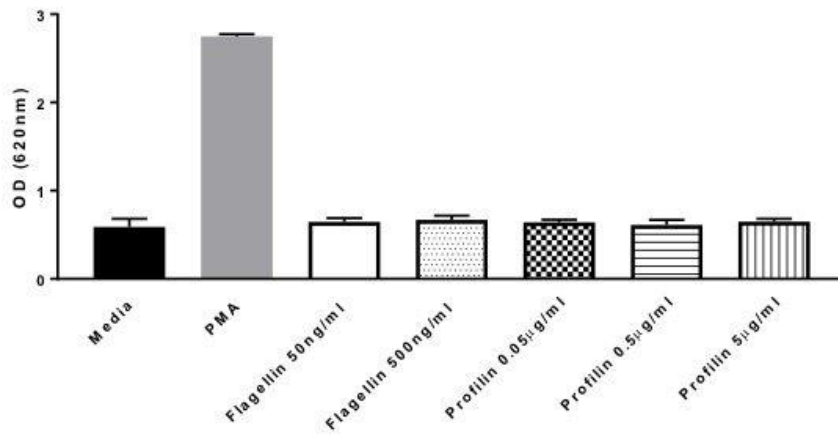

**Supplementary Figure 3.** SEAP assay results from a commercially available HEK293 cell line stably expressing a SEAP reporter and mouse TLR11. Cells were assayed with 50 and 100 ng ml<sup>-1</sup> FliC, 0.05, 0.5 and 5 µg ml<sup>-1</sup> TgPr, media only (negative control) and PMA (positive control). SEAP activity was measured by a colour change resulting from alkaline phosphate substrate conversion at wavelength 620 nm in duplicates (mean ± SD).
